# Supplementary figures and images for: Ki67 Assessment By qRT-PCR In OncotypeDx® Breast Recurrent Score®: Low Correlation With Immunohistochemistry Assessment of Ki67 And Prognostic Impact of Ki67 RNA Level of Expression.
Source: Research Square preprint supplement (doi:10.21203/rs.3.rs-677106/v1), 2021-07-15

ADDITIONAL FILES


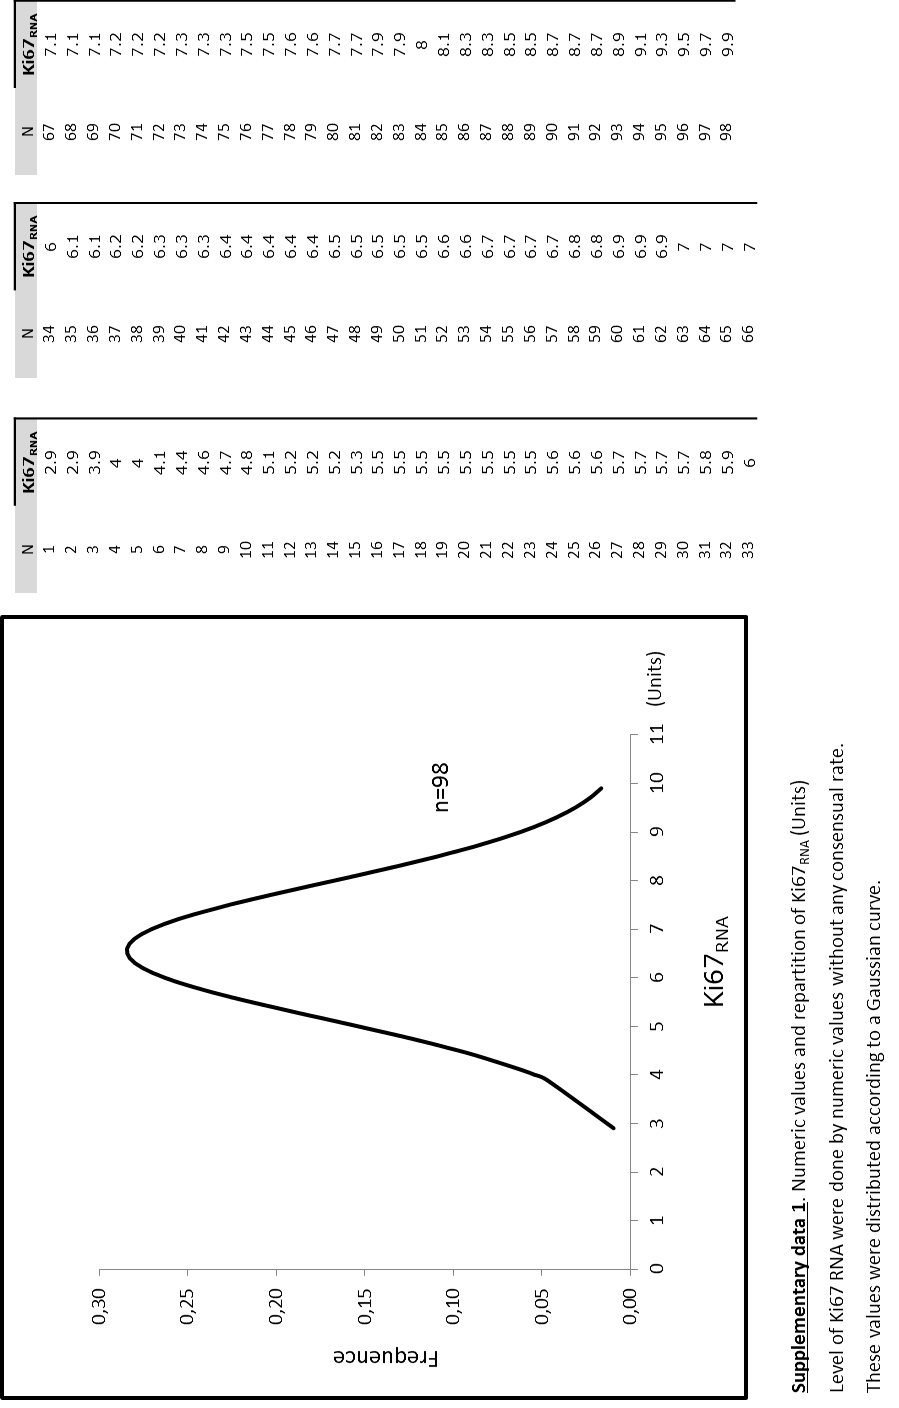


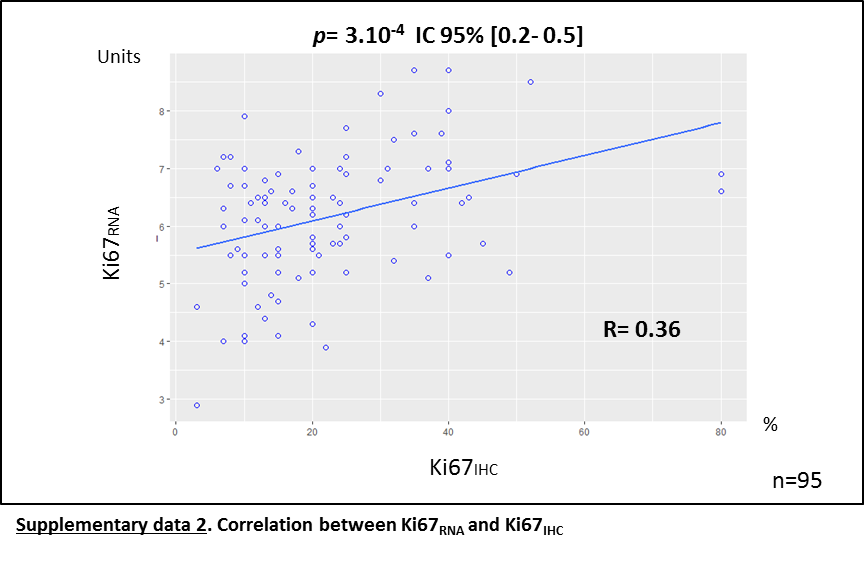


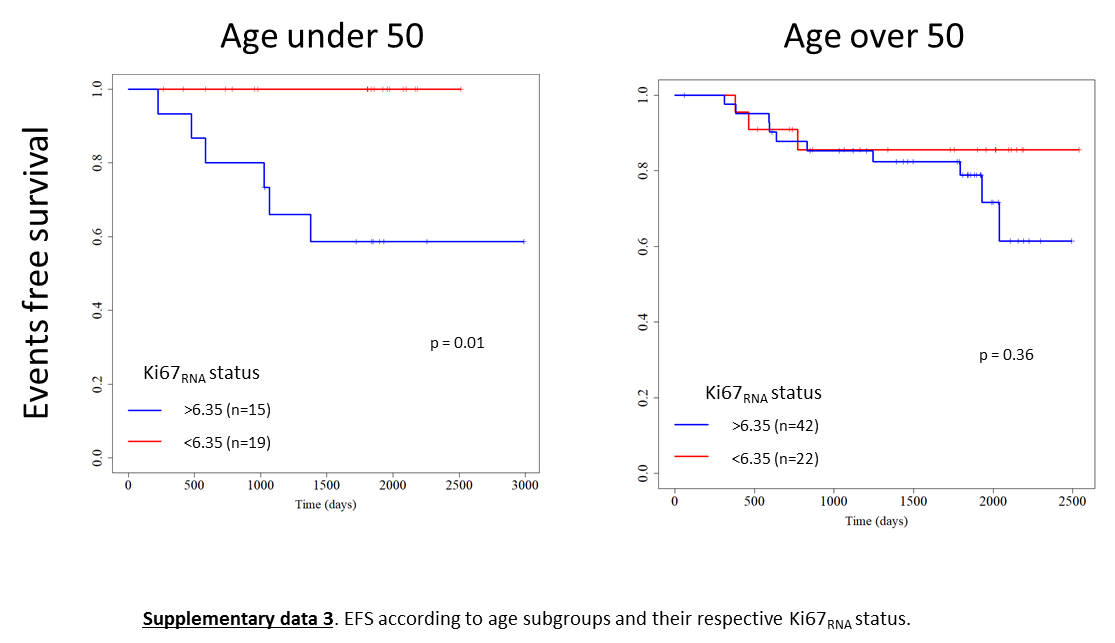


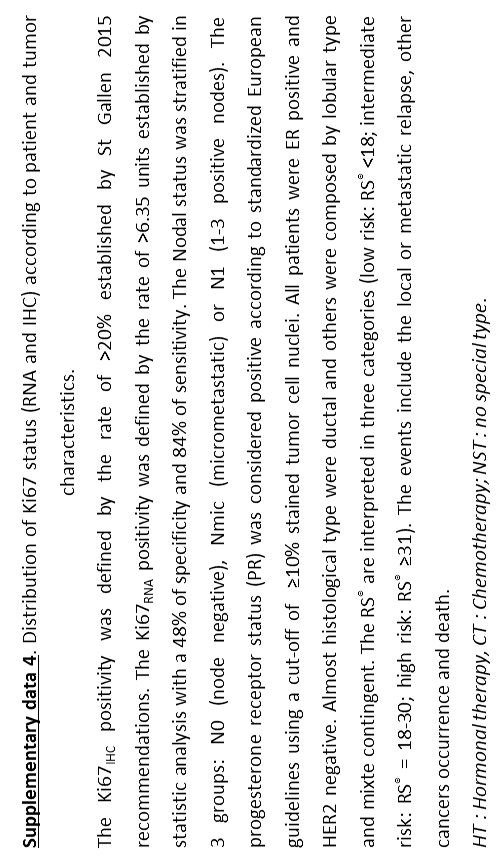

Supplement: Supplementary file 1 [file 84bea996090f1e6ea71b59bc.docx]
